# Supplementary material for: Atezolizumab plus stereotactic ablative radiotherapy for medically inoperable patients with early-stage non-small cell lung cancer: a multi-institutional phase I trial
Source: PubMed Central journal article supplement (PMC10474145; doi:10.1038/s41467-023-40813-w), 2023-09-02
Supplement: 41467_2023_40813_MOESM3_ESM.pdf [file 41467_2023_40813_MOESM3_ESM.pdf]

## Reporting Summary

Nature Portfolio wishes to improve the reproducibility of the work that we publish. This form provides structure for consistency and transparency in reporting. For further information on Nature Portfolio policies, see our [Editorial Policies](#) and the [Editorial Policy Checklist](#).

### Statistics

For all statistical analyses, confirm that the following items are present in the figure legend, table legend, main text, or Methods section.

n/a Confirmed

- |                                     |                                     |                                                                                                                                                                                                                                                            |
|-------------------------------------|-------------------------------------|------------------------------------------------------------------------------------------------------------------------------------------------------------------------------------------------------------------------------------------------------------|
| <input type="checkbox"/>            | <input checked="" type="checkbox"/> | The exact sample size ( $n$ ) for each experimental group/condition, given as a discrete number and unit of measurement                                                                                                                                    |
| <input type="checkbox"/>            | <input checked="" type="checkbox"/> | A statement on whether measurements were taken from distinct samples or whether the same sample was measured repeatedly                                                                                                                                    |
| <input type="checkbox"/>            | <input checked="" type="checkbox"/> | The statistical test(s) used AND whether they are one- or two-sided<br><i>Only common tests should be described solely by name; describe more complex techniques in the Methods section.</i>                                                               |
| <input checked="" type="checkbox"/> | <input type="checkbox"/>            | A description of all covariates tested                                                                                                                                                                                                                     |
| <input type="checkbox"/>            | <input checked="" type="checkbox"/> | A description of any assumptions or corrections, such as tests of normality and adjustment for multiple comparisons                                                                                                                                        |
| <input type="checkbox"/>            | <input checked="" type="checkbox"/> | A full description of the statistical parameters including central tendency (e.g. means) or other basic estimates (e.g. regression coefficient) AND variation (e.g. standard deviation) or associated estimates of uncertainty (e.g. confidence intervals) |
| <input type="checkbox"/>            | <input checked="" type="checkbox"/> | For null hypothesis testing, the test statistic (e.g. $F$ , $t$ , $r$ ) with confidence intervals, effect sizes, degrees of freedom and $P$ value noted<br><i>Give <math>P</math> values as exact values whenever suitable.</i>                            |
| <input checked="" type="checkbox"/> | <input type="checkbox"/>            | For Bayesian analysis, information on the choice of priors and Markov chain Monte Carlo settings                                                                                                                                                           |
| <input checked="" type="checkbox"/> | <input type="checkbox"/>            | For hierarchical and complex designs, identification of the appropriate level for tests and full reporting of outcomes                                                                                                                                     |
| <input checked="" type="checkbox"/> | <input type="checkbox"/>            | Estimates of effect sizes (e.g. Cohen's $d$ , Pearson's $r$ ), indicating how they were calculated                                                                                                                                                         |

*Our web collection on [statistics for biologists](#) contains articles on many of the points above.*

### Software and code

Policy information about [availability of computer code](#)

Data collection

Data analysis

For manuscripts utilizing custom algorithms or software that are central to the research but not yet described in published literature, software must be made available to editors and reviewers. We strongly encourage code deposition in a community repository (e.g. GitHub). See the Nature Portfolio [guidelines for submitting code & software](#) for further information.

### Data

Policy information about [availability of data](#)

All manuscripts must include a [data availability statement](#). This statement should provide the following information, where applicable:

- Accession codes, unique identifiers, or web links for publicly available datasets
- A description of any restrictions on data availability
- For clinical datasets or third party data, please ensure that the statement adheres to our [policy](#)

The RNA sequencing data generated in this study have been deposited in the sequence read archive (SRA) database under accession code PRJNA999721 [https://www.ncbi.nlm.nih.gov/bioproject/999721]. Individual de-identified participant data on demographics, toxicity, and clinical outcomes, will be maintained by the UC Davis Cancer Center Office of Clinical Research and will be shared for academic purposes on request (Dr. Megan E. Daly, medaly@ucdavis.edu) for at least two years from the date of publication, with the completion of a data access agreement. Individual de-identified data for correlative studies and transcriptomics is included in

the manuscript or publicly available as listed above. Multiplex IHC imaging data is maintained by Dr. Kurt Schalper (kurt.schalper@yale.edu) and will be shared for academic purposes on request for at least 2 years from the date of publication. The study protocol is available as Supplementary Note in the Supplementary Information file.

Source data are provided with this paper. The remaining data are available within the Article, Supplementary Information or Source Data file.

## Human research participants

Policy information about [studies involving human research participants and Sex and Gender in Research](#).

### Reporting on sex and gender

We did not collect data on sex. We collected self reported sex (gender) characteristics. These are reported in the manuscript. 9 patients identified as male and 11 as female. No analysis was planned or performed based on sex or gender given the small number of patients in this early phase clinical trial.

### Population characteristics

Information on age, gender, performance status, smoking status, stage, and high risk features is reported in table 1. Data on race was collected but not included in Table 1. 15 patients were white, 3 were African American, 1 was Asian, and 1 was Native American.

### Recruitment

Please see the protocol recruitment plan below:

UCDCCC: Patients will be identified at the UC Davis multidisciplinary lung cancer tumor board where new cases are presented and in pulmonary, thoracic surgery and radiation oncology across the UC Davis Health System. Broad recruitment efforts at UC Davis include 1) discussion of the trial at the bimonthly clinical investigators meeting upon trial activation, 2) weekly email broadcasts of phase I trial slot availability; and 3) monthly cancer clinical trials updates to all oncologists, radiation oncologists and surgeons in the northern and central California region.

Mercy: Patients will be identified by the radiation oncologists at Mercy Cancer Center or Mercy San Juan Medical Center and referred to UCDCCC for consultation about the trial. Trial flyers and monthly email reminders are sent to these physicians.

Military patients and families: Identification of veterans for trial eligibility will be conducted by UC Davis faculty that staff VA Mather and VA Martinez and by radiation oncologists at David Grant USAF Medical Center. David Grant USAF Medical Center physicians may also recruit other military service members or their families. Monthly email reminders are sent to these physicians.

Cedars-Sinai Medical Center: Patients will be identified through their multidisciplinary lung cancer tumor board and email reminders. Pls will participate in the monthly trial updates meeting.

### Ethics oversight

The study was approved by the IRB at UC Davis, Cedars Sinai, and VA David Grant Medical Center

Note that full information on the approval of the study protocol must also be provided in the manuscript.

## Field-specific reporting

Please select the one below that is the best fit for your research. If you are not sure, read the appropriate sections before making your selection.

Life sciences  Behavioural & social sciences  Ecological, evolutionary & environmental sciences

For a reference copy of the document with all sections, see [nature.com/documents/nr-reporting-summary-flat.pdf](https://www.nature.com/documents/nr-reporting-summary-flat.pdf)

## Life sciences study design

All studies must disclose on these points even when the disclosure is negative.

### Sample size

Sample size was determined by the trial design using a traditional 3 + 3 phase I dose escalation design with three planned dose levels and 3-6 patients at each dose level. An expansion cohort of 15 patients was planned but this was closed early due to opening of the Phase III trial.

### Data exclusions

No data was excluded, some patients were not evaluable and did not have all data available as described in the manuscript.

### Replication

For the clinical trial data no repeated measures were used. For correlative studies repeated measures were used as indicated (multiple fields were counted for PD-L1 histology and multi-plex IF).

### Randomization

This is a single arm trial and there was no randomization.

### Blinding

This is a single arm trial and there was no randomization or assigned groups for blinding.

## Reporting for specific materials, systems and methods

We require information from authors about some types of materials, experimental systems and methods used in many studies. Here, indicate whether each material, system or method listed is relevant to your study. If you are not sure if a list item applies to your research, read the appropriate section before selecting a response.

## Materials &amp; experimental systems

| n/a                                 | Involvement                                            |
|-------------------------------------|--------------------------------------------------------|
| <input type="checkbox"/>            | <input checked="" type="checkbox"/> Antibodies         |
| <input checked="" type="checkbox"/> | <input type="checkbox"/> Eukaryotic cell lines         |
| <input checked="" type="checkbox"/> | <input type="checkbox"/> Palaeontology and archaeology |
| <input checked="" type="checkbox"/> | <input type="checkbox"/> Animals and other organisms   |
| <input type="checkbox"/>            | <input checked="" type="checkbox"/> Clinical data      |
| <input checked="" type="checkbox"/> | <input type="checkbox"/> Dual use research of concern  |

## Methods

| n/a                                 | Involvement                                        |
|-------------------------------------|----------------------------------------------------|
| <input checked="" type="checkbox"/> | <input type="checkbox"/> ChIP-seq                  |
| <input type="checkbox"/>            | <input checked="" type="checkbox"/> Flow cytometry |
| <input checked="" type="checkbox"/> | <input type="checkbox"/> MRI-based neuroimaging    |

## Antibodies

## Antibodies used

This data is available in supplemental table 2 but we have also included it here as requested. Live/dead Aqua NA Invitrogen L34957

CD3 BB515 UCHT1 BD Bioscience 564465  
 CD4 BuV395 L200 BD Bioscience 564107  
 CD8 BuV737 SK1 BD Bioscience 612754  
 FoxP3 Alexa647 259D/C7 BD Bioscience 560045  
 GranB Alexa700 GB11 BD Bioscience 560213  
 IL10 BV421 JES3-9D7 BD Bioscience 566276  
 TNFa BV711 MAb11 BioLegend 502940  
 CD25 PE M-A251 BD Bioscience 560989  
 Ki67 PE-Cy5 SoLA15 Invitrogen 15-5698-82  
 IFNg PE-Cy7 4S.B3 BD Bioscience 557844  
 TGFb PE-CF594 TW4-9E7 BD Bioscience 562422  
 PD1 BB700 EH12.1 BD Bioscience 566461

T cell Panel  
 Live/dead Aqua NA Invitrogen L34957  
 CD3 BB515 UCHT1 BD Bioscience 564465  
 CD4 BuV395 L200 BD Bioscience 564107  
 CD8 BuV737 SK1 BD Bioscience 612754  
 CD45RO BV711 UCHL1 BD Bioscience 563723  
 CD19 BV605 SJ25C1 BD Bioscience 562653  
 CD25 PECF594 M-A251 BD Bioscience 562403  
 PD-1 PE MIH4 BD Bioscience 560908  
 CD278 BV785 C398.4A BD Bioscience 567923  
 Ki67 PE-Cy5 SoLA15 Invitrogen 15-5698-82  
 HLADR PE-Cy7 G46-6 BD Bioscience 560651

TREG / NK panel  
 Live/dead Aqua NA Invitrogen L34957  
 CD3 BB515 UCHT1 BD Bioscience 564465  
 CD4 BuV395 L200 BD Bioscience 564107  
 CD8 BuV737 SK1 BD Bioscience 612754  
 CD16 Alexa700 3G8 BD Bioscience 557920  
 CD56 PE MY31 BD Bioscience 566647  
 CD25 PECF594 M-A251 BD Bioscience 562403  
 FoxP3 Alexa647 259D/C7 BD Bioscience 560045  
 TIGIT BB700 741182 BD Bioscience 741182  
 TIM3 BV711 7D3 BD Bioscience 565566

B cell panel  
 Live/dead Aqua NA Invitrogen L34957  
 CD19 BV786 SJ25C1 BD Bioscience 563325  
 HLADR PE-Cy7 G46-6 BD Bioscience 560651  
 IgD BB700 IA6-2 BD Bioscience 566538  
 CD27 Alexa647 M-T271 BioLegend 366434  
 CD5 BV605 UCHT2 BD Bioscience 563945  
 CD1d PE CD1d42 BD Bioscience 550255  
 CD25 PECF594 M-A251 BD Bioscience 562403  
 PDL1 BuV395 MIH1 BD Bioscience 740320  
 IL10 BV421 JES3-9D7 BD Bioscience 566276

MDSC / DC panel  
 Live/dead Aqua NA Invitrogen L34957  
 CD3 BV711 OKT3 BioLegend 317328  
 CD19 BV711 SJ25C1 BD Bioscience 563036  
 CD56 BV711 B159 BD Bioscience 740781  
 CD14 BuV395 MφP9 BD Bioscience 563562  
 CD11b PECY7 M1/70 BD Bioscience 561098

CD33 BB515 WM53 BD Bioscience 564588  
 HLADR BB700 G46-6 BD Bioscience 566481  
 CD11c BV605 B-ly6 BD Bioscience 563930  
 CD1c PE F10/21A3 BD Bioscience 564900  
 CD141 BV421 1A4 BD Bioscience 563321  
 CD303 BV786 V24-785 BD Bioscience 748000  
 PDL1 APC MIH1 BD Bioscience 563741

Validation All anti-bodies used are commercially available and have been previously validated by the manufacturer as well as in published data.

## Clinical data

Policy information about [clinical studies](#)

All manuscripts should comply with the ICMJE [guidelines for publication of clinical research](#) and a completed [CONSORT checklist](#) must be included with all submissions.

|                             |                                                                                                                                                                                                                                                                                                                                                                                                                                                                                                                                                                                                                                                                                                                                                                                                                                                                                                                                                                                                                                                                                                                                                                          |
|-----------------------------|--------------------------------------------------------------------------------------------------------------------------------------------------------------------------------------------------------------------------------------------------------------------------------------------------------------------------------------------------------------------------------------------------------------------------------------------------------------------------------------------------------------------------------------------------------------------------------------------------------------------------------------------------------------------------------------------------------------------------------------------------------------------------------------------------------------------------------------------------------------------------------------------------------------------------------------------------------------------------------------------------------------------------------------------------------------------------------------------------------------------------------------------------------------------------|
| Clinical trial registration | NCT02599454                                                                                                                                                                                                                                                                                                                                                                                                                                                                                                                                                                                                                                                                                                                                                                                                                                                                                                                                                                                                                                                                                                                                                              |
| Study protocol              | The full study protocol has been submitted with the supplemental information                                                                                                                                                                                                                                                                                                                                                                                                                                                                                                                                                                                                                                                                                                                                                                                                                                                                                                                                                                                                                                                                                             |
| Data collection             | Data collection occurred at UC Davis Comprehensive Cancer Center, David Grant Medical Center, and Cedars Sinai Medical Center from 4/2016 - 4/2021                                                                                                                                                                                                                                                                                                                                                                                                                                                                                                                                                                                                                                                                                                                                                                                                                                                                                                                                                                                                                       |
| Outcomes                    | <p>1.1 Primary Objective<br/>         To determine the maximum tolerated dose (MTD) of MPDL3280A that can be given with SAR in patients with inoperable early stage NSCLC.</p> <p>1.2 Secondary Objectives<br/>         1.2.1 To characterize the safety profile of this regimen using CTCAE v4 (Common Toxicity Criteria for Adverse Events version 4)<br/>         1.2.2 To provide preliminary efficacy data of the combination as determine by objective response rate and disease free survival using RECIST 1.1 (Response Evaluation Criteria for Solid Tumors) and Immune Related RECIST (irRECIST).</p> <p>1.3 Exploratory Objectives<br/>         1.3.1 To analyze serial blood for change in cytokine signatures, FACS and immunophenotyping of peripheral blood mononuclear cells (PBMCs) and tumor infiltrating immune cells.<br/>         1.3.2 To evaluate pre and post treatment tumor tissue (if available) for PD-L1 and other immune proteins in the tumor and tumor microenvironment and for molecular profiling in a subset of patient samples.<br/>         1.3.3 To discover biomarkers of response from the data obtained in 1.3.1 and 1.3.2.</p> |

## Flow Cytometry

### Plots

Confirm that:

- The axis labels state the marker and fluorochrome used (e.g. CD4-FITC).
- The axis scales are clearly visible. Include numbers along axes only for bottom left plot of group (a 'group' is an analysis of identical markers).
- All plots are contour plots with outliers or pseudocolor plots.
- A numerical value for number of cells or percentage (with statistics) is provided.

### Methodology

|                           |                                                                                                                                                                                                                                                                                                                                                                                                                                                                                |
|---------------------------|--------------------------------------------------------------------------------------------------------------------------------------------------------------------------------------------------------------------------------------------------------------------------------------------------------------------------------------------------------------------------------------------------------------------------------------------------------------------------------|
| Sample preparation        | Cryopreserved PBMCs were thawed, washed, and viability was assessed. They were then incubated with Fc-block (BD Bioscience, 202 Franklin Lakes, NJ) on ice for 15 minutes. Then, cells were stained with specific antibody cocktails 203 (supplemental Table 2) for 1 h on ice, and then stained with Aqua-LIVE/DEAD (Invitrogen, 204 Carlsbad, CA) for 30 min at room temperature. Cells were washed after each step using PBS containing 0.5% BSA and before being analyzed. |
| Instrument                | BD Fortessa flow cytometer (BD 206 Bioscience, Franklin Lakes, NJ).                                                                                                                                                                                                                                                                                                                                                                                                            |
| Software                  | FlowJo V10.6.2                                                                                                                                                                                                                                                                                                                                                                                                                                                                 |
| Cell population abundance | Sorting was not performed.                                                                                                                                                                                                                                                                                                                                                                                                                                                     |
| Gating strategy           | Gating was performed using fluorescence minus one groups to set the negative gate. Gating strategies are demonstrated in representative flow plots throughout the manuscript.                                                                                                                                                                                                                                                                                                  |

- Tick this box to confirm that a figure exemplifying the gating strategy is provided in the Supplementary Information.
